# Supplementary material for: Development of a machine learning model in prediction of the rapid progression of interstitial lung disease in patients with idiopathic inflammatory myopathy
Source: PubMed Central journal article supplement — Quant Imaging Med Surg. 2024 Nov 8;14(12):9258–75. doi: 10.21037/qims-24-595 (PMC11652001; doi:10.21037/qims-24-595), 2024-11-08
Supplement: qims-14-12-9258-coif.pdf [file qims-14-12-9258-coif.pdf]

## ICMJE DISCLOSURE FORM

Date: 2024.3.24

Your Name: Yuhui Qiang

Manuscript Title: Development of machine learning model in prediction of the rapid progression of interstitial lung disease in patients with idiopathic inflammatory myopathy

Manuscript number (if known): \_\_\_\_\_

In the interest of transparency, we ask you to disclose all relationships/activities/interests listed below that are related to the content of your manuscript. "Related" means any relation with for-profit or not-for-profit third parties whose interests may be affected by the content of the manuscript. Disclosure represents a commitment to transparency and does not necessarily indicate a bias. If you are in doubt about whether to list a relationship/activity/interest, it is preferable that you do so.

The following questions apply to the author's relationships/activities/interests as they relate to the current manuscript only.

The author's relationships/activities/interests should be defined broadly. For example, if your manuscript pertains to the epidemiology of hypertension, you should declare all relationships with manufacturers of antihypertensive medication, even if that medication is not mentioned in the manuscript.

In item #1 below, report all support for the work reported in this manuscript without time limit. For all other items, the time frame for disclosure is the past 36 months.

|                                                           |                                                                                                                                                                                | Name all entities with whom you have this relationship or indicate none (add rows as needed)            | Specifications/Comments (e.g., if payments were made to you or to your institution) |
|-----------------------------------------------------------|--------------------------------------------------------------------------------------------------------------------------------------------------------------------------------|---------------------------------------------------------------------------------------------------------|-------------------------------------------------------------------------------------|
| <b>Time frame: Since the initial planning of the work</b> |                                                                                                                                                                                |                                                                                                         |                                                                                     |
| 1                                                         | All support for the present manuscript (e.g., funding, provision of study materials, medical writing, article processing charges, etc.)<br><b>No time limit for this item.</b> | National Key Technologies R & D Program Precision Medicine Research (2021YFC2500700 and 2016YFC0901101) |                                                                                     |
|                                                           |                                                                                                                                                                                | National Natural Science Foundation of China [81870056]                                                 |                                                                                     |
|                                                           |                                                                                                                                                                                |                                                                                                         |                                                                                     |
|                                                           |                                                                                                                                                                                |                                                                                                         |                                                                                     |
|                                                           |                                                                                                                                                                                |                                                                                                         |                                                                                     |
| <b>Time frame: past 36 months</b>                         |                                                                                                                                                                                |                                                                                                         |                                                                                     |
| 2                                                         | Grants or contracts from any entity (if not indicated in item #1 above).                                                                                                       | None                                                                                                    |                                                                                     |
|                                                           |                                                                                                                                                                                |                                                                                                         |                                                                                     |
| 3                                                         | Royalties or licenses                                                                                                                                                          | None                                                                                                    |                                                                                     |

|    |                                                                                                              |          |  |
|----|--------------------------------------------------------------------------------------------------------------|----------|--|
|    |                                                                                                              |          |  |
| 4  | Consulting fees                                                                                              | ___ None |  |
| 5  | Payment or honoraria for lectures, presentations, speakers bureaus, manuscript writing or educational events | ___ None |  |
| 6  | Payment for expert testimony                                                                                 | ___ None |  |
| 7  | Support for attending meetings and/or travel                                                                 | ___ None |  |
| 8  | Patents planned, issued or pending                                                                           | ___ None |  |
| 9  | Participation on a Data Safety Monitoring Board or Advisory Board                                            | ___ None |  |
| 10 | Leadership or fiduciary role in other board, society, committee or advocacy group, paid or unpaid            | ___ None |  |
| 11 | Stock or stock options                                                                                       | ___ None |  |
| 12 | Receipt of equipment, materials, drugs, medical writing, gifts or other services                             | ___ None |  |
| 13 | Other financial or non-financial interests                                                                   | ___ None |  |

**Please summarize the above conflict of interest in the following box:**

This study was supported by National Key Technologies R & D Program Precision Medicine Research (2021YFC2500700 and 2016YFC0901101) and National Natural Science Foundation of China [81870056].

**Please place an “X” next to the following statement to indicate your agreement:**

X  I certify that I have answered every question and have not altered the wording of any of the questions on this form.

## ICMJE DISCLOSURE FORM

Date: 2024.3.24

Your Name: Hongyi Wang

Manuscript Title: Development of machine learning model in prediction of the rapid progression of interstitial lung disease in patients with idiopathic inflammatory myopathy

Manuscript number (if known): \_\_\_\_\_

In the interest of transparency, we ask you to disclose all relationships/activities/interests listed below that are related to the content of your manuscript. "Related" means any relation with for-profit or not-for-profit third parties whose interests may be affected by the content of the manuscript. Disclosure represents a commitment to transparency and does not necessarily indicate a bias. If you are in doubt about whether to list a relationship/activity/interest, it is preferable that you do so.

The following questions apply to the author's relationships/activities/interests as they relate to the current manuscript only.

The author's relationships/activities/interests should be defined broadly. For example, if your manuscript pertains to the epidemiology of hypertension, you should declare all relationships with manufacturers of antihypertensive medication, even if that medication is not mentioned in the manuscript.

In item #1 below, report all support for the work reported in this manuscript without time limit. For all other items, the time frame for disclosure is the past 36 months.

|                                                           |                                                                                                                                                                                | Name all entities with whom you have this relationship or indicate none (add rows as needed)            | Specifications/Comments (e.g., if payments were made to you or to your institution) |
|-----------------------------------------------------------|--------------------------------------------------------------------------------------------------------------------------------------------------------------------------------|---------------------------------------------------------------------------------------------------------|-------------------------------------------------------------------------------------|
| <b>Time frame: Since the initial planning of the work</b> |                                                                                                                                                                                |                                                                                                         |                                                                                     |
| 1                                                         | All support for the present manuscript (e.g., funding, provision of study materials, medical writing, article processing charges, etc.)<br><b>No time limit for this item.</b> | National Key Technologies R & D Program Precision Medicine Research (2021YFC2500700 and 2016YFC0901101) |                                                                                     |
|                                                           |                                                                                                                                                                                | National Natural Science Foundation of China [81870056]                                                 |                                                                                     |
|                                                           |                                                                                                                                                                                |                                                                                                         |                                                                                     |
|                                                           |                                                                                                                                                                                |                                                                                                         |                                                                                     |
| <b>Time frame: past 36 months</b>                         |                                                                                                                                                                                |                                                                                                         |                                                                                     |
| 2                                                         | Grants or contracts from any entity (if not indicated in item #1 above).                                                                                                       | None                                                                                                    |                                                                                     |
|                                                           |                                                                                                                                                                                |                                                                                                         |                                                                                     |
| 3                                                         | Royalties or licenses                                                                                                                                                          | None                                                                                                    |                                                                                     |
|                                                           |                                                                                                                                                                                |                                                                                                         |                                                                                     |

|    |                                                                                                              |           |  |
|----|--------------------------------------------------------------------------------------------------------------|-----------|--|
| 4  | Consulting fees                                                                                              | ____ None |  |
|    |                                                                                                              |           |  |
|    |                                                                                                              |           |  |
| 5  | Payment or honoraria for lectures, presentations, speakers bureaus, manuscript writing or educational events | ____ None |  |
|    |                                                                                                              |           |  |
|    |                                                                                                              |           |  |
| 6  | Payment for expert testimony                                                                                 | ____ None |  |
|    |                                                                                                              |           |  |
|    |                                                                                                              |           |  |
| 7  | Support for attending meetings and/or travel                                                                 | ____ None |  |
|    |                                                                                                              |           |  |
|    |                                                                                                              |           |  |
| 8  | Patents planned, issued or pending                                                                           | ____ None |  |
|    |                                                                                                              |           |  |
|    |                                                                                                              |           |  |
| 9  | Participation on a Data Safety Monitoring Board or Advisory Board                                            | ____ None |  |
|    |                                                                                                              |           |  |
|    |                                                                                                              |           |  |
| 10 | Leadership or fiduciary role in other board, society, committee or advocacy group, paid or unpaid            | ____ None |  |
|    |                                                                                                              |           |  |
|    |                                                                                                              |           |  |
| 11 | Stock or stock options                                                                                       | ____ None |  |
|    |                                                                                                              |           |  |
|    |                                                                                                              |           |  |
| 12 | Receipt of equipment, materials, drugs, medical writing, gifts or other services                             | ____ None |  |
|    |                                                                                                              |           |  |
|    |                                                                                                              |           |  |
| 13 | Other financial or non-financial interests                                                                   | ____ None |  |
|    |                                                                                                              |           |  |
|    |                                                                                                              |           |  |

**Please summarize the above conflict of interest in the following box:**

This study was supported by National Key Technologies R & D Program Precision Medicine Research (2021YFC2500700 and 2016YFC0901101) and National Natural Science Foundation of China [81870056].

**Please place an “X” next to the following statement to indicate your agreement:**

**X I certify that I have answered every question and have not altered the wording of any of the questions on this form.**

## ICMJE DISCLOSURE FORM

Date: 2024.3.24

Your Name: Yifei Ni

Manuscript Title: Development of machine learning model in prediction of the rapid progression of interstitial lung disease in patients with idiopathic inflammatory myopathy

Manuscript number (if known): \_\_\_\_\_

In the interest of transparency, we ask you to disclose all relationships/activities/interests listed below that are related to the content of your manuscript. "Related" means any relation with for-profit or not-for-profit third parties whose interests may be affected by the content of the manuscript. Disclosure represents a commitment to transparency and does not necessarily indicate a bias. If you are in doubt about whether to list a relationship/activity/interest, it is preferable that you do so.

The following questions apply to the author's relationships/activities/interests as they relate to the current manuscript only.

The author's relationships/activities/interests should be defined broadly. For example, if your manuscript pertains to the epidemiology of hypertension, you should declare all relationships with manufacturers of antihypertensive medication, even if that medication is not mentioned in the manuscript.

In item #1 below, report all support for the work reported in this manuscript without time limit. For all other items, the time frame for disclosure is the past 36 months.

|                                                           |                                                                                                                                                                                | Name all entities with whom you have this relationship or indicate none (add rows as needed)            | Specifications/Comments (e.g., if payments were made to you or to your institution) |
|-----------------------------------------------------------|--------------------------------------------------------------------------------------------------------------------------------------------------------------------------------|---------------------------------------------------------------------------------------------------------|-------------------------------------------------------------------------------------|
| <b>Time frame: Since the initial planning of the work</b> |                                                                                                                                                                                |                                                                                                         |                                                                                     |
| 1                                                         | All support for the present manuscript (e.g., funding, provision of study materials, medical writing, article processing charges, etc.)<br><b>No time limit for this item.</b> | National Key Technologies R & D Program Precision Medicine Research (2021YFC2500700 and 2016YFC0901101) |                                                                                     |
|                                                           |                                                                                                                                                                                | National Natural Science Foundation of China [81870056]                                                 |                                                                                     |
|                                                           |                                                                                                                                                                                |                                                                                                         |                                                                                     |
|                                                           |                                                                                                                                                                                |                                                                                                         |                                                                                     |
| <b>Time frame: past 36 months</b>                         |                                                                                                                                                                                |                                                                                                         |                                                                                     |
| 2                                                         | Grants or contracts from any entity (if not indicated in item #1 above).                                                                                                       | None                                                                                                    |                                                                                     |
|                                                           |                                                                                                                                                                                |                                                                                                         |                                                                                     |
| 3                                                         | Royalties or licenses                                                                                                                                                          | None                                                                                                    |                                                                                     |
|                                                           |                                                                                                                                                                                |                                                                                                         |                                                                                     |

|    |                                                                                                              |           |  |
|----|--------------------------------------------------------------------------------------------------------------|-----------|--|
| 4  | Consulting fees                                                                                              | ____ None |  |
|    |                                                                                                              |           |  |
|    |                                                                                                              |           |  |
| 5  | Payment or honoraria for lectures, presentations, speakers bureaus, manuscript writing or educational events | ____ None |  |
|    |                                                                                                              |           |  |
|    |                                                                                                              |           |  |
| 6  | Payment for expert testimony                                                                                 | ____ None |  |
|    |                                                                                                              |           |  |
|    |                                                                                                              |           |  |
| 7  | Support for attending meetings and/or travel                                                                 | ____ None |  |
|    |                                                                                                              |           |  |
|    |                                                                                                              |           |  |
| 8  | Patents planned, issued or pending                                                                           | ____ None |  |
|    |                                                                                                              |           |  |
|    |                                                                                                              |           |  |
| 9  | Participation on a Data Safety Monitoring Board or Advisory Board                                            | ____ None |  |
|    |                                                                                                              |           |  |
|    |                                                                                                              |           |  |
| 10 | Leadership or fiduciary role in other board, society, committee or advocacy group, paid or unpaid            | ____ None |  |
|    |                                                                                                              |           |  |
|    |                                                                                                              |           |  |
| 11 | Stock or stock options                                                                                       | ____ None |  |
|    |                                                                                                              |           |  |
|    |                                                                                                              |           |  |
| 12 | Receipt of equipment, materials, drugs, medical writing, gifts or other services                             | ____ None |  |
|    |                                                                                                              |           |  |
|    |                                                                                                              |           |  |
| 13 | Other financial or non-financial interests                                                                   | ____ None |  |
|    |                                                                                                              |           |  |
|    |                                                                                                              |           |  |

**Please summarize the above conflict of interest in the following box:**

This study was supported by National Key Technologies R & D Program Precision Medicine Research (2021YFC2500700 and 2016YFC0901101) and National Natural Science Foundation of China [81870056].

**Please place an “X” next to the following statement to indicate your agreement:**

X  I certify that I have answered every question and have not altered the wording of any of the questions on this form.

## ICMJE DISCLOSURE FORM

Date: 2024.3.24

Your Name: Jianping Wang

Manuscript Title: Development of machine learning model in prediction of the rapid progression of interstitial lung disease in patients with idiopathic inflammatory myopathy

Manuscript number (if known): \_\_\_\_\_

In the interest of transparency, we ask you to disclose all relationships/activities/interests listed below that are related to the content of your manuscript. "Related" means any relation with for-profit or not-for-profit third parties whose interests may be affected by the content of the manuscript. Disclosure represents a commitment to transparency and does not necessarily indicate a bias. If you are in doubt about whether to list a relationship/activity/interest, it is preferable that you do so.

The following questions apply to the author's relationships/activities/interests as they relate to the current manuscript only.

The author's relationships/activities/interests should be defined broadly. For example, if your manuscript pertains to the epidemiology of hypertension, you should declare all relationships with manufacturers of antihypertensive medication, even if that medication is not mentioned in the manuscript.

In item #1 below, report all support for the work reported in this manuscript without time limit. For all other items, the time frame for disclosure is the past 36 months.

|                                                           |                                                                                                                                                                                | Name all entities with whom you have this relationship or indicate none (add rows as needed)            | Specifications/Comments (e.g., if payments were made to you or to your institution) |
|-----------------------------------------------------------|--------------------------------------------------------------------------------------------------------------------------------------------------------------------------------|---------------------------------------------------------------------------------------------------------|-------------------------------------------------------------------------------------|
| <b>Time frame: Since the initial planning of the work</b> |                                                                                                                                                                                |                                                                                                         |                                                                                     |
| 1                                                         | All support for the present manuscript (e.g., funding, provision of study materials, medical writing, article processing charges, etc.)<br><b>No time limit for this item.</b> | National Key Technologies R & D Program Precision Medicine Research (2021YFC2500700 and 2016YFC0901101) |                                                                                     |
|                                                           |                                                                                                                                                                                | National Natural Science Foundation of China [81870056]                                                 |                                                                                     |
|                                                           |                                                                                                                                                                                |                                                                                                         |                                                                                     |
|                                                           |                                                                                                                                                                                |                                                                                                         |                                                                                     |
| <b>Time frame: past 36 months</b>                         |                                                                                                                                                                                |                                                                                                         |                                                                                     |
| 2                                                         | Grants or contracts from any entity (if not indicated in item #1 above).                                                                                                       | None                                                                                                    |                                                                                     |
|                                                           |                                                                                                                                                                                |                                                                                                         |                                                                                     |
|                                                           |                                                                                                                                                                                |                                                                                                         |                                                                                     |
| 3                                                         | Royalties or licenses                                                                                                                                                          | None                                                                                                    |                                                                                     |
|                                                           |                                                                                                                                                                                |                                                                                                         |                                                                                     |
|                                                           |                                                                                                                                                                                |                                                                                                         |                                                                                     |

|    |                                                                                                              |            |  |
|----|--------------------------------------------------------------------------------------------------------------|------------|--|
| 4  | Consulting fees                                                                                              | _____ None |  |
|    |                                                                                                              |            |  |
|    |                                                                                                              |            |  |
| 5  | Payment or honoraria for lectures, presentations, speakers bureaus, manuscript writing or educational events | _____ None |  |
|    |                                                                                                              |            |  |
|    |                                                                                                              |            |  |
| 6  | Payment for expert testimony                                                                                 | _____ None |  |
|    |                                                                                                              |            |  |
|    |                                                                                                              |            |  |
| 7  | Support for attending meetings and/or travel                                                                 | _____ None |  |
|    |                                                                                                              |            |  |
|    |                                                                                                              |            |  |
| 8  | Patents planned, issued or pending                                                                           | _____ None |  |
|    |                                                                                                              |            |  |
|    |                                                                                                              |            |  |
| 9  | Participation on a Data Safety Monitoring Board or Advisory Board                                            | _____ None |  |
|    |                                                                                                              |            |  |
|    |                                                                                                              |            |  |
| 10 | Leadership or fiduciary role in other board, society, committee or advocacy group, paid or unpaid            | _____ None |  |
|    |                                                                                                              |            |  |
|    |                                                                                                              |            |  |
| 11 | Stock or stock options                                                                                       | _____ None |  |
|    |                                                                                                              |            |  |
|    |                                                                                                              |            |  |
| 12 | Receipt of equipment, materials, drugs, medical writing, gifts or other services                             | _____ None |  |
|    |                                                                                                              |            |  |
|    |                                                                                                              |            |  |
| 13 | Other financial or non-financial interests                                                                   | _____ None |  |
|    |                                                                                                              |            |  |
|    |                                                                                                              |            |  |

**Please summarize the above conflict of interest in the following box:**

This study was supported by National Key Technologies R & D Program Precision Medicine Research (2021YFC2500700 and 2016YFC0901101) and National Natural Science Foundation of China [81870056].

**Please place an “X” next to the following statement to indicate your agreement:**

**X   I certify that I have answered every question and have not altered the wording of any of the questions on this form.**



## ICMJE DISCLOSURE FORM

Date: 2024.3.24

Your Name: Anqi Liu

Manuscript Title: Development of machine learning model in prediction of the rapid progression of interstitial lung disease in patients with idiopathic inflammatory myopathy

Manuscript number (if known): \_\_\_\_\_

In the interest of transparency, we ask you to disclose all relationships/activities/interests listed below that are related to the content of your manuscript. "Related" means any relation with for-profit or not-for-profit third parties whose interests may be affected by the content of the manuscript. Disclosure represents a commitment to transparency and does not necessarily indicate a bias. If you are in doubt about whether to list a relationship/activity/interest, it is preferable that you do so.

The following questions apply to the author's relationships/activities/interests as they relate to the current manuscript only.

The author's relationships/activities/interests should be defined broadly. For example, if your manuscript pertains to the epidemiology of hypertension, you should declare all relationships with manufacturers of antihypertensive medication, even if that medication is not mentioned in the manuscript.

In item #1 below, report all support for the work reported in this manuscript without time limit. For all other items, the time frame for disclosure is the past 36 months.

|                                                           |                                                                                                                                                                                | Name all entities with whom you have this relationship or indicate none (add rows as needed)            | Specifications/Comments (e.g., if payments were made to you or to your institution) |
|-----------------------------------------------------------|--------------------------------------------------------------------------------------------------------------------------------------------------------------------------------|---------------------------------------------------------------------------------------------------------|-------------------------------------------------------------------------------------|
| <b>Time frame: Since the initial planning of the work</b> |                                                                                                                                                                                |                                                                                                         |                                                                                     |
| 1                                                         | All support for the present manuscript (e.g., funding, provision of study materials, medical writing, article processing charges, etc.)<br><b>No time limit for this item.</b> | National Key Technologies R & D Program Precision Medicine Research (2021YFC2500700 and 2016YFC0901101) |                                                                                     |
|                                                           |                                                                                                                                                                                | National Natural Science Foundation of China [81870056]                                                 |                                                                                     |
|                                                           |                                                                                                                                                                                |                                                                                                         |                                                                                     |
|                                                           |                                                                                                                                                                                |                                                                                                         |                                                                                     |
| <b>Time frame: past 36 months</b>                         |                                                                                                                                                                                |                                                                                                         |                                                                                     |
| 2                                                         | Grants or contracts from any entity (if not indicated in item #1 above).                                                                                                       | None                                                                                                    |                                                                                     |
|                                                           |                                                                                                                                                                                |                                                                                                         |                                                                                     |
| 3                                                         | Royalties or licenses                                                                                                                                                          | None                                                                                                    |                                                                                     |
|                                                           |                                                                                                                                                                                |                                                                                                         |                                                                                     |

|    |                                                                                                              |           |  |
|----|--------------------------------------------------------------------------------------------------------------|-----------|--|
| 4  | Consulting fees                                                                                              | ____ None |  |
|    |                                                                                                              |           |  |
|    |                                                                                                              |           |  |
| 5  | Payment or honoraria for lectures, presentations, speakers bureaus, manuscript writing or educational events | ____ None |  |
|    |                                                                                                              |           |  |
|    |                                                                                                              |           |  |
| 6  | Payment for expert testimony                                                                                 | ____ None |  |
|    |                                                                                                              |           |  |
|    |                                                                                                              |           |  |
| 7  | Support for attending meetings and/or travel                                                                 | ____ None |  |
|    |                                                                                                              |           |  |
|    |                                                                                                              |           |  |
| 8  | Patents planned, issued or pending                                                                           | ____ None |  |
|    |                                                                                                              |           |  |
|    |                                                                                                              |           |  |
| 9  | Participation on a Data Safety Monitoring Board or Advisory Board                                            | ____ None |  |
|    |                                                                                                              |           |  |
|    |                                                                                                              |           |  |
| 10 | Leadership or fiduciary role in other board, society, committee or advocacy group, paid or unpaid            | ____ None |  |
|    |                                                                                                              |           |  |
|    |                                                                                                              |           |  |
| 11 | Stock or stock options                                                                                       | ____ None |  |
|    |                                                                                                              |           |  |
|    |                                                                                                              |           |  |
| 12 | Receipt of equipment, materials, drugs, medical writing, gifts or other services                             | ____ None |  |
|    |                                                                                                              |           |  |
|    |                                                                                                              |           |  |
| 13 | Other financial or non-financial interests                                                                   | ____ None |  |
|    |                                                                                                              |           |  |
|    |                                                                                                              |           |  |

**Please summarize the above conflict of interest in the following box:**

This study was supported by National Key Technologies R & D Program Precision Medicine Research (2021YFC2500700 and 2016YFC0901101) and National Natural Science Foundation of China [81870056].

**Please place an “X” next to the following statement to indicate your agreement:**

X  I certify that I have answered every question and have not altered the wording of any of the questions on this form.

## ICMJE DISCLOSURE FORM

Date: 2024.3.24

Your Name: Haoyu Yang

Manuscript Title: Development of machine learning model in prediction of the rapid progression of interstitial lung disease in patients with idiopathic inflammatory myopathy

Manuscript number (if known): \_\_\_\_\_

In the interest of transparency, we ask you to disclose all relationships/activities/interests listed below that are related to the content of your manuscript. "Related" means any relation with for-profit or not-for-profit third parties whose interests may be affected by the content of the manuscript. Disclosure represents a commitment to transparency and does not necessarily indicate a bias. If you are in doubt about whether to list a relationship/activity/interest, it is preferable that you do so.

The following questions apply to the author's relationships/activities/interests as they relate to the current manuscript only.

The author's relationships/activities/interests should be defined broadly. For example, if your manuscript pertains to the epidemiology of hypertension, you should declare all relationships with manufacturers of antihypertensive medication, even if that medication is not mentioned in the manuscript.

In item #1 below, report all support for the work reported in this manuscript without time limit. For all other items, the time frame for disclosure is the past 36 months.

|                                                           |                                                                                                                                                                                | Name all entities with whom you have this relationship or indicate none (add rows as needed)            | Specifications/Comments (e.g., if payments were made to you or to your institution) |
|-----------------------------------------------------------|--------------------------------------------------------------------------------------------------------------------------------------------------------------------------------|---------------------------------------------------------------------------------------------------------|-------------------------------------------------------------------------------------|
| <b>Time frame: Since the initial planning of the work</b> |                                                                                                                                                                                |                                                                                                         |                                                                                     |
| 1                                                         | All support for the present manuscript (e.g., funding, provision of study materials, medical writing, article processing charges, etc.)<br><b>No time limit for this item.</b> | National Key Technologies R & D Program Precision Medicine Research (2021YFC2500700 and 2016YFC0901101) |                                                                                     |
|                                                           |                                                                                                                                                                                | National Natural Science Foundation of China [81870056]                                                 |                                                                                     |
|                                                           |                                                                                                                                                                                |                                                                                                         |                                                                                     |
|                                                           |                                                                                                                                                                                |                                                                                                         |                                                                                     |
| <b>Time frame: past 36 months</b>                         |                                                                                                                                                                                |                                                                                                         |                                                                                     |
| 2                                                         | Grants or contracts from any entity (if not indicated in item #1 above).                                                                                                       | None                                                                                                    |                                                                                     |
|                                                           |                                                                                                                                                                                |                                                                                                         |                                                                                     |
| 3                                                         | Royalties or licenses                                                                                                                                                          | None                                                                                                    |                                                                                     |
|                                                           |                                                                                                                                                                                |                                                                                                         |                                                                                     |

|    |                                                                                                              |           |  |
|----|--------------------------------------------------------------------------------------------------------------|-----------|--|
| 4  | Consulting fees                                                                                              | ____ None |  |
|    |                                                                                                              |           |  |
|    |                                                                                                              |           |  |
| 5  | Payment or honoraria for lectures, presentations, speakers bureaus, manuscript writing or educational events | ____ None |  |
|    |                                                                                                              |           |  |
|    |                                                                                                              |           |  |
| 6  | Payment for expert testimony                                                                                 | ____ None |  |
|    |                                                                                                              |           |  |
|    |                                                                                                              |           |  |
| 7  | Support for attending meetings and/or travel                                                                 | ____ None |  |
|    |                                                                                                              |           |  |
|    |                                                                                                              |           |  |
| 8  | Patents planned, issued or pending                                                                           | ____ None |  |
|    |                                                                                                              |           |  |
|    |                                                                                                              |           |  |
| 9  | Participation on a Data Safety Monitoring Board or Advisory Board                                            | ____ None |  |
|    |                                                                                                              |           |  |
|    |                                                                                                              |           |  |
| 10 | Leadership or fiduciary role in other board, society, committee or advocacy group, paid or unpaid            | ____ None |  |
|    |                                                                                                              |           |  |
|    |                                                                                                              |           |  |
| 11 | Stock or stock options                                                                                       | ____ None |  |
|    |                                                                                                              |           |  |
|    |                                                                                                              |           |  |
| 12 | Receipt of equipment, materials, drugs, medical writing, gifts or other services                             | ____ None |  |
|    |                                                                                                              |           |  |
|    |                                                                                                              |           |  |
| 13 | Other financial or non-financial interests                                                                   | ____ None |  |
|    |                                                                                                              |           |  |
|    |                                                                                                              |           |  |

**Please summarize the above conflict of interest in the following box:**

This study was supported by National Key Technologies R & D Program Precision Medicine Research (2021YFC2500700 and 2016YFC0901101) and National Natural Science Foundation of China [81870056].

**Please place an “X” next to the following statement to indicate your agreement:**

X  I certify that I have answered every question and have not altered the wording of any of the questions on this form.

## ICMJE DISCLOSURE FORM

Date: 2024.3.24

Your Name: Linfeng Xi

Manuscript Title: Development of machine learning model in prediction of the rapid progression of interstitial lung disease in patients with idiopathic inflammatory myopathy

Manuscript number (if known): \_\_\_\_\_

In the interest of transparency, we ask you to disclose all relationships/activities/interests listed below that are related to the content of your manuscript. "Related" means any relation with for-profit or not-for-profit third parties whose interests may be affected by the content of the manuscript. Disclosure represents a commitment to transparency and does not necessarily indicate a bias. If you are in doubt about whether to list a relationship/activity/interest, it is preferable that you do so.

The following questions apply to the author's relationships/activities/interests as they relate to the current manuscript only.

The author's relationships/activities/interests should be defined broadly. For example, if your manuscript pertains to the epidemiology of hypertension, you should declare all relationships with manufacturers of antihypertensive medication, even if that medication is not mentioned in the manuscript.

In item #1 below, report all support for the work reported in this manuscript without time limit. For all other items, the time frame for disclosure is the past 36 months.

|                                                           |                                                                                                                                                                                | Name all entities with whom you have this relationship or indicate none (add rows as needed)            | Specifications/Comments (e.g., if payments were made to you or to your institution) |
|-----------------------------------------------------------|--------------------------------------------------------------------------------------------------------------------------------------------------------------------------------|---------------------------------------------------------------------------------------------------------|-------------------------------------------------------------------------------------|
| <b>Time frame: Since the initial planning of the work</b> |                                                                                                                                                                                |                                                                                                         |                                                                                     |
| 1                                                         | All support for the present manuscript (e.g., funding, provision of study materials, medical writing, article processing charges, etc.)<br><b>No time limit for this item.</b> | National Key Technologies R & D Program Precision Medicine Research (2021YFC2500700 and 2016YFC0901101) |                                                                                     |
|                                                           |                                                                                                                                                                                | National Natural Science Foundation of China [81870056]                                                 |                                                                                     |
|                                                           |                                                                                                                                                                                |                                                                                                         |                                                                                     |
|                                                           |                                                                                                                                                                                |                                                                                                         |                                                                                     |
| <b>Time frame: past 36 months</b>                         |                                                                                                                                                                                |                                                                                                         |                                                                                     |
| 2                                                         | Grants or contracts from any entity (if not indicated in item #1 above).                                                                                                       | _____ None                                                                                              |                                                                                     |
|                                                           |                                                                                                                                                                                |                                                                                                         |                                                                                     |
|                                                           |                                                                                                                                                                                |                                                                                                         |                                                                                     |
| 3                                                         | Royalties or licenses                                                                                                                                                          | _____ None                                                                                              |                                                                                     |
|                                                           |                                                                                                                                                                                |                                                                                                         |                                                                                     |
|                                                           |                                                                                                                                                                                |                                                                                                         |                                                                                     |

|    |                                                                                                              |           |  |
|----|--------------------------------------------------------------------------------------------------------------|-----------|--|
| 4  | Consulting fees                                                                                              | ____ None |  |
|    |                                                                                                              |           |  |
|    |                                                                                                              |           |  |
| 5  | Payment or honoraria for lectures, presentations, speakers bureaus, manuscript writing or educational events | ____ None |  |
|    |                                                                                                              |           |  |
|    |                                                                                                              |           |  |
| 6  | Payment for expert testimony                                                                                 | ____ None |  |
|    |                                                                                                              |           |  |
|    |                                                                                                              |           |  |
| 7  | Support for attending meetings and/or travel                                                                 | ____ None |  |
|    |                                                                                                              |           |  |
|    |                                                                                                              |           |  |
| 8  | Patents planned, issued or pending                                                                           | ____ None |  |
|    |                                                                                                              |           |  |
|    |                                                                                                              |           |  |
| 9  | Participation on a Data Safety Monitoring Board or Advisory Board                                            | ____ None |  |
|    |                                                                                                              |           |  |
|    |                                                                                                              |           |  |
| 10 | Leadership or fiduciary role in other board, society, committee or advocacy group, paid or unpaid            | ____ None |  |
|    |                                                                                                              |           |  |
|    |                                                                                                              |           |  |
| 11 | Stock or stock options                                                                                       | ____ None |  |
|    |                                                                                                              |           |  |
|    |                                                                                                              |           |  |
| 12 | Receipt of equipment, materials, drugs, medical writing, gifts or other services                             | ____ None |  |
|    |                                                                                                              |           |  |
|    |                                                                                                              |           |  |
| 13 | Other financial or non-financial interests                                                                   | ____ None |  |
|    |                                                                                                              |           |  |
|    |                                                                                                              |           |  |

**Please summarize the above conflict of interest in the following box:**

This study was supported by National Key Technologies R & D Program Precision Medicine Research (2021YFC2500700 and 2016YFC0901101) and National Natural Science Foundation of China [81870056].

**Please place an “X” next to the following statement to indicate your agreement:**

**X I certify that I have answered every question and have not altered the wording of any of the questions on this form.**

## ICMJE DISCLOSURE FORM

Date: 2024.3.24

Your Name: Yanhong Ren

Manuscript Title: Development of machine learning model in prediction of the rapid progression of interstitial lung disease in patients with idiopathic inflammatory myopathy

Manuscript number (if known): \_\_\_\_\_

In the interest of transparency, we ask you to disclose all relationships/activities/interests listed below that are related to the content of your manuscript. "Related" means any relation with for-profit or not-for-profit third parties whose interests may be affected by the content of the manuscript. Disclosure represents a commitment to transparency and does not necessarily indicate a bias. If you are in doubt about whether to list a relationship/activity/interest, it is preferable that you do so.

The following questions apply to the author's relationships/activities/interests as they relate to the current manuscript only.

The author's relationships/activities/interests should be defined broadly. For example, if your manuscript pertains to the epidemiology of hypertension, you should declare all relationships with manufacturers of antihypertensive medication, even if that medication is not mentioned in the manuscript.

In item #1 below, report all support for the work reported in this manuscript without time limit. For all other items, the time frame for disclosure is the past 36 months.

|                                                           |                                                                                                                                                                                | Name all entities with whom you have this relationship or indicate none (add rows as needed)            | Specifications/Comments (e.g., if payments were made to you or to your institution) |
|-----------------------------------------------------------|--------------------------------------------------------------------------------------------------------------------------------------------------------------------------------|---------------------------------------------------------------------------------------------------------|-------------------------------------------------------------------------------------|
| <b>Time frame: Since the initial planning of the work</b> |                                                                                                                                                                                |                                                                                                         |                                                                                     |
| 1                                                         | All support for the present manuscript (e.g., funding, provision of study materials, medical writing, article processing charges, etc.)<br><b>No time limit for this item.</b> | National Key Technologies R & D Program Precision Medicine Research (2021YFC2500700 and 2016YFC0901101) |                                                                                     |
|                                                           |                                                                                                                                                                                | National Natural Science Foundation of China [81870056]                                                 |                                                                                     |
|                                                           |                                                                                                                                                                                |                                                                                                         |                                                                                     |
|                                                           |                                                                                                                                                                                |                                                                                                         |                                                                                     |
| <b>Time frame: past 36 months</b>                         |                                                                                                                                                                                |                                                                                                         |                                                                                     |
| 2                                                         | Grants or contracts from any entity (if not indicated in item #1 above).                                                                                                       | None                                                                                                    |                                                                                     |
|                                                           |                                                                                                                                                                                |                                                                                                         |                                                                                     |
| 3                                                         | Royalties or licenses                                                                                                                                                          | None                                                                                                    |                                                                                     |
|                                                           |                                                                                                                                                                                |                                                                                                         |                                                                                     |

|    |                                                                                                              |                  |  |
|----|--------------------------------------------------------------------------------------------------------------|------------------|--|
| 4  | Consulting fees                                                                                              | <u>    </u> None |  |
|    |                                                                                                              |                  |  |
|    |                                                                                                              |                  |  |
| 5  | Payment or honoraria for lectures, presentations, speakers bureaus, manuscript writing or educational events | <u>    </u> None |  |
|    |                                                                                                              |                  |  |
|    |                                                                                                              |                  |  |
| 6  | Payment for expert testimony                                                                                 | <u>    </u> None |  |
|    |                                                                                                              |                  |  |
|    |                                                                                                              |                  |  |
| 7  | Support for attending meetings and/or travel                                                                 | <u>    </u> None |  |
|    |                                                                                                              |                  |  |
|    |                                                                                                              |                  |  |
| 8  | Patents planned, issued or pending                                                                           | <u>    </u> None |  |
|    |                                                                                                              |                  |  |
|    |                                                                                                              |                  |  |
| 9  | Participation on a Data Safety Monitoring Board or Advisory Board                                            | <u>    </u> None |  |
|    |                                                                                                              |                  |  |
|    |                                                                                                              |                  |  |
| 10 | Leadership or fiduciary role in other board, society, committee or advocacy group, paid or unpaid            | <u>    </u> None |  |
|    |                                                                                                              |                  |  |
|    |                                                                                                              |                  |  |
| 11 | Stock or stock options                                                                                       | <u>    </u> None |  |
|    |                                                                                                              |                  |  |
|    |                                                                                                              |                  |  |
| 12 | Receipt of equipment, materials, drugs, medical writing, gifts or other services                             | <u>    </u> None |  |
|    |                                                                                                              |                  |  |
|    |                                                                                                              |                  |  |
| 13 | Other financial or non-financial interests                                                                   | <u>    </u> None |  |
|    |                                                                                                              |                  |  |
|    |                                                                                                              |                  |  |

**Please summarize the above conflict of interest in the following box:**

This study was supported by National Key Technologies R & D Program Precision Medicine Research (2021YFC2500700 and 2016YFC0901101) and National Natural Science Foundation of China [81870056].

**Please place an “X” next to the following statement to indicate your agreement:**

  X   I certify that I have answered every question and have not altered the wording of any of the questions on this form.



## ICMJE DISCLOSURE FORM

Date: 2024.3.24

Your Name: Bingbing Xie

Manuscript Title: Development of machine learning model in prediction of the rapid progression of interstitial lung disease in patients with idiopathic inflammatory myopathy

Manuscript number (if known): \_\_\_\_\_

In the interest of transparency, we ask you to disclose all relationships/activities/interests listed below that are related to the content of your manuscript. "Related" means any relation with for-profit or not-for-profit third parties whose interests may be affected by the content of the manuscript. Disclosure represents a commitment to transparency and does not necessarily indicate a bias. If you are in doubt about whether to list a relationship/activity/interest, it is preferable that you do so.

The following questions apply to the author's relationships/activities/interests as they relate to the current manuscript only.

The author's relationships/activities/interests should be defined broadly. For example, if your manuscript pertains to the epidemiology of hypertension, you should declare all relationships with manufacturers of antihypertensive medication, even if that medication is not mentioned in the manuscript.

In item #1 below, report all support for the work reported in this manuscript without time limit. For all other items, the time frame for disclosure is the past 36 months.

|                                                           |                                                                                                                                                                                | Name all entities with whom you have this relationship or indicate none (add rows as needed)            | Specifications/Comments (e.g., if payments were made to you or to your institution) |
|-----------------------------------------------------------|--------------------------------------------------------------------------------------------------------------------------------------------------------------------------------|---------------------------------------------------------------------------------------------------------|-------------------------------------------------------------------------------------|
| <b>Time frame: Since the initial planning of the work</b> |                                                                                                                                                                                |                                                                                                         |                                                                                     |
| 1                                                         | All support for the present manuscript (e.g., funding, provision of study materials, medical writing, article processing charges, etc.)<br><b>No time limit for this item.</b> | National Key Technologies R & D Program Precision Medicine Research (2021YFC2500700 and 2016YFC0901101) |                                                                                     |
|                                                           |                                                                                                                                                                                | National Natural Science Foundation of China [81870056]                                                 |                                                                                     |
|                                                           |                                                                                                                                                                                |                                                                                                         |                                                                                     |
|                                                           |                                                                                                                                                                                |                                                                                                         |                                                                                     |
| <b>Time frame: past 36 months</b>                         |                                                                                                                                                                                |                                                                                                         |                                                                                     |
| 2                                                         | Grants or contracts from any entity (if not indicated in item #1 above).                                                                                                       | _____ None                                                                                              |                                                                                     |
|                                                           |                                                                                                                                                                                |                                                                                                         |                                                                                     |
|                                                           |                                                                                                                                                                                |                                                                                                         |                                                                                     |
| 3                                                         | Royalties or licenses                                                                                                                                                          | _____ None                                                                                              |                                                                                     |
|                                                           |                                                                                                                                                                                |                                                                                                         |                                                                                     |
|                                                           |                                                                                                                                                                                |                                                                                                         |                                                                                     |

|    |                                                                                                              |                    |  |
|----|--------------------------------------------------------------------------------------------------------------|--------------------|--|
| 4  | Consulting fees                                                                                              | <u>      </u> None |  |
|    |                                                                                                              |                    |  |
|    |                                                                                                              |                    |  |
| 5  | Payment or honoraria for lectures, presentations, speakers bureaus, manuscript writing or educational events | <u>      </u> None |  |
|    |                                                                                                              |                    |  |
|    |                                                                                                              |                    |  |
| 6  | Payment for expert testimony                                                                                 | <u>      </u> None |  |
|    |                                                                                                              |                    |  |
|    |                                                                                                              |                    |  |
| 7  | Support for attending meetings and/or travel                                                                 | <u>      </u> None |  |
|    |                                                                                                              |                    |  |
|    |                                                                                                              |                    |  |
| 8  | Patents planned, issued or pending                                                                           | <u>      </u> None |  |
|    |                                                                                                              |                    |  |
|    |                                                                                                              |                    |  |
| 9  | Participation on a Data Safety Monitoring Board or Advisory Board                                            | <u>      </u> None |  |
|    |                                                                                                              |                    |  |
|    |                                                                                                              |                    |  |
| 10 | Leadership or fiduciary role in other board, society, committee or advocacy group, paid or unpaid            | <u>      </u> None |  |
|    |                                                                                                              |                    |  |
|    |                                                                                                              |                    |  |
| 11 | Stock or stock options                                                                                       | <u>      </u> None |  |
|    |                                                                                                              |                    |  |
|    |                                                                                                              |                    |  |
| 12 | Receipt of equipment, materials, drugs, medical writing, gifts or other services                             | <u>      </u> None |  |
|    |                                                                                                              |                    |  |
|    |                                                                                                              |                    |  |
| 13 | Other financial or non-financial interests                                                                   | <u>      </u> None |  |
|    |                                                                                                              |                    |  |
|    |                                                                                                              |                    |  |

**Please summarize the above conflict of interest in the following box:**

This study was supported by National Key Technologies R & D Program Precision Medicine Research (2021YFC2500700 and 2016YFC0901101) and National Natural Science Foundation of China [81870056].

**Please place an “X” next to the following statement to indicate your agreement:**

  X   I certify that I have answered every question and have not altered the wording of any of the questions on this form.

## ICMJE DISCLOSURE FORM

Date: 2024.3.24

Your Name: Shiyao Wang

Manuscript Title: Development of machine learning model in prediction of the rapid progression of interstitial lung disease in patients with idiopathic inflammatory myopathy

Manuscript number (if known): \_\_\_\_\_

In the interest of transparency, we ask you to disclose all relationships/activities/interests listed below that are related to the content of your manuscript. "Related" means any relation with for-profit or not-for-profit third parties whose interests may be affected by the content of the manuscript. Disclosure represents a commitment to transparency and does not necessarily indicate a bias. If you are in doubt about whether to list a relationship/activity/interest, it is preferable that you do so.

The following questions apply to the author's relationships/activities/interests as they relate to the current manuscript only.

The author's relationships/activities/interests should be defined broadly. For example, if your manuscript pertains to the epidemiology of hypertension, you should declare all relationships with manufacturers of antihypertensive medication, even if that medication is not mentioned in the manuscript.

In item #1 below, report all support for the work reported in this manuscript without time limit. For all other items, the time frame for disclosure is the past 36 months.

|                                                           |                                                                                                                                                                                | Name all entities with whom you have this relationship or indicate none (add rows as needed)            | Specifications/Comments (e.g., if payments were made to you or to your institution) |
|-----------------------------------------------------------|--------------------------------------------------------------------------------------------------------------------------------------------------------------------------------|---------------------------------------------------------------------------------------------------------|-------------------------------------------------------------------------------------|
| <b>Time frame: Since the initial planning of the work</b> |                                                                                                                                                                                |                                                                                                         |                                                                                     |
| 1                                                         | All support for the present manuscript (e.g., funding, provision of study materials, medical writing, article processing charges, etc.)<br><b>No time limit for this item.</b> | National Key Technologies R & D Program Precision Medicine Research (2021YFC2500700 and 2016YFC0901101) |                                                                                     |
|                                                           |                                                                                                                                                                                | National Natural Science Foundation of China [81870056]                                                 |                                                                                     |
|                                                           |                                                                                                                                                                                |                                                                                                         |                                                                                     |
| <b>Time frame: past 36 months</b>                         |                                                                                                                                                                                |                                                                                                         |                                                                                     |
| 2                                                         | Grants or contracts from any entity (if not indicated in item #1 above).                                                                                                       | None                                                                                                    |                                                                                     |
| 3                                                         | Royalties or licenses                                                                                                                                                          | None                                                                                                    |                                                                                     |

|    |                                                                                                              |           |  |
|----|--------------------------------------------------------------------------------------------------------------|-----------|--|
| 4  | Consulting fees                                                                                              | ____ None |  |
|    |                                                                                                              |           |  |
|    |                                                                                                              |           |  |
| 5  | Payment or honoraria for lectures, presentations, speakers bureaus, manuscript writing or educational events | ____ None |  |
|    |                                                                                                              |           |  |
|    |                                                                                                              |           |  |
| 6  | Payment for expert testimony                                                                                 | ____ None |  |
|    |                                                                                                              |           |  |
|    |                                                                                                              |           |  |
| 7  | Support for attending meetings and/or travel                                                                 | ____ None |  |
|    |                                                                                                              |           |  |
|    |                                                                                                              |           |  |
| 8  | Patents planned, issued or pending                                                                           | ____ None |  |
|    |                                                                                                              |           |  |
|    |                                                                                                              |           |  |
| 9  | Participation on a Data Safety Monitoring Board or Advisory Board                                            | ____ None |  |
|    |                                                                                                              |           |  |
|    |                                                                                                              |           |  |
| 10 | Leadership or fiduciary role in other board, society, committee or advocacy group, paid or unpaid            | ____ None |  |
|    |                                                                                                              |           |  |
|    |                                                                                                              |           |  |
| 11 | Stock or stock options                                                                                       | ____ None |  |
|    |                                                                                                              |           |  |
|    |                                                                                                              |           |  |
| 12 | Receipt of equipment, materials, drugs, medical writing, gifts or other services                             | ____ None |  |
|    |                                                                                                              |           |  |
|    |                                                                                                              |           |  |
| 13 | Other financial or non-financial interests                                                                   | ____ None |  |
|    |                                                                                                              |           |  |
|    |                                                                                                              |           |  |

**Please summarize the above conflict of interest in the following box:**

This study was supported by National Key Technologies R & D Program Precision Medicine Research (2021YFC2500700 and 2016YFC0901101) and National Natural Science Foundation of China [81870056].

**Please place an “X” next to the following statement to indicate your agreement:**

**X   I certify that I have answered every question and have not altered the wording of any of the questions on this form.**

## ICMJE DISCLOSURE FORM

Date: 2024.3.24

Your Name: Min Liu

Manuscript Title: Development of machine learning model in prediction of the rapid progression of interstitial lung disease in patients with idiopathic inflammatory myopathy

Manuscript number (if known): \_\_\_\_\_

In the interest of transparency, we ask you to disclose all relationships/activities/interests listed below that are related to the content of your manuscript. "Related" means any relation with for-profit or not-for-profit third parties whose interests may be affected by the content of the manuscript. Disclosure represents a commitment to transparency and does not necessarily indicate a bias. If you are in doubt about whether to list a relationship/activity/interest, it is preferable that you do so.

The following questions apply to the author's relationships/activities/interests as they relate to the current manuscript only.

The author's relationships/activities/interests should be defined broadly. For example, if your manuscript pertains to the epidemiology of hypertension, you should declare all relationships with manufacturers of antihypertensive medication, even if that medication is not mentioned in the manuscript.

In item #1 below, report all support for the work reported in this manuscript without time limit. For all other items, the time frame for disclosure is the past 36 months.

|                                                           |                                                                                                                                                                                | Name all entities with whom you have this relationship or indicate none (add rows as needed)            | Specifications/Comments (e.g., if payments were made to you or to your institution) |
|-----------------------------------------------------------|--------------------------------------------------------------------------------------------------------------------------------------------------------------------------------|---------------------------------------------------------------------------------------------------------|-------------------------------------------------------------------------------------|
| <b>Time frame: Since the initial planning of the work</b> |                                                                                                                                                                                |                                                                                                         |                                                                                     |
| 1                                                         | All support for the present manuscript (e.g., funding, provision of study materials, medical writing, article processing charges, etc.)<br><b>No time limit for this item.</b> | National Key Technologies R & D Program Precision Medicine Research (2021YFC2500700 and 2016YFC0901101) |                                                                                     |
|                                                           |                                                                                                                                                                                | National Natural Science Foundation of China [81870056]                                                 |                                                                                     |
|                                                           |                                                                                                                                                                                |                                                                                                         |                                                                                     |
|                                                           |                                                                                                                                                                                |                                                                                                         |                                                                                     |
| <b>Time frame: past 36 months</b>                         |                                                                                                                                                                                |                                                                                                         |                                                                                     |
| 2                                                         | Grants or contracts from any entity (if not indicated in item #1 above).                                                                                                       | _____ None                                                                                              |                                                                                     |
|                                                           |                                                                                                                                                                                |                                                                                                         |                                                                                     |
|                                                           |                                                                                                                                                                                |                                                                                                         |                                                                                     |
| 3                                                         | Royalties or licenses                                                                                                                                                          | _____ None                                                                                              |                                                                                     |
|                                                           |                                                                                                                                                                                |                                                                                                         |                                                                                     |
|                                                           |                                                                                                                                                                                |                                                                                                         |                                                                                     |

|    |                                                                                                              |                    |  |
|----|--------------------------------------------------------------------------------------------------------------|--------------------|--|
| 4  | Consulting fees                                                                                              | <u>      </u> None |  |
|    |                                                                                                              |                    |  |
|    |                                                                                                              |                    |  |
| 5  | Payment or honoraria for lectures, presentations, speakers bureaus, manuscript writing or educational events | <u>      </u> None |  |
|    |                                                                                                              |                    |  |
|    |                                                                                                              |                    |  |
| 6  | Payment for expert testimony                                                                                 | <u>      </u> None |  |
|    |                                                                                                              |                    |  |
|    |                                                                                                              |                    |  |
| 7  | Support for attending meetings and/or travel                                                                 | <u>      </u> None |  |
|    |                                                                                                              |                    |  |
|    |                                                                                                              |                    |  |
| 8  | Patents planned, issued or pending                                                                           | <u>      </u> None |  |
|    |                                                                                                              |                    |  |
|    |                                                                                                              |                    |  |
| 9  | Participation on a Data Safety Monitoring Board or Advisory Board                                            | <u>      </u> None |  |
|    |                                                                                                              |                    |  |
|    |                                                                                                              |                    |  |
| 10 | Leadership or fiduciary role in other board, society, committee or advocacy group, paid or unpaid            | <u>      </u> None |  |
|    |                                                                                                              |                    |  |
|    |                                                                                                              |                    |  |
| 11 | Stock or stock options                                                                                       | <u>      </u> None |  |
|    |                                                                                                              |                    |  |
|    |                                                                                                              |                    |  |
| 12 | Receipt of equipment, materials, drugs, medical writing, gifts or other services                             | <u>      </u> None |  |
|    |                                                                                                              |                    |  |
|    |                                                                                                              |                    |  |
| 13 | Other financial or non-financial interests                                                                   | <u>      </u> None |  |
|    |                                                                                                              |                    |  |
|    |                                                                                                              |                    |  |

**Please summarize the above conflict of interest in the following box:**

This study was supported by National Key Technologies R & D Program Precision Medicine Research (2021YFC2500700 and 2016YFC0901101) and National Natural Science Foundation of China [81870056].

**Please place an “X” next to the following statement to indicate your agreement:**

**X   I certify that I have answered every question and have not altered the wording of any of the questions on this form.**

## ICMJE DISCLOSURE FORM

Date: 2024.3.24

Your Name: Chen Wang

Manuscript Title: Development of machine learning model in prediction of the rapid progression of interstitial lung disease in patients with idiopathic inflammatory myopathy

Manuscript number (if known): \_\_\_\_\_

In the interest of transparency, we ask you to disclose all relationships/activities/interests listed below that are related to the content of your manuscript. "Related" means any relation with for-profit or not-for-profit third parties whose interests may be affected by the content of the manuscript. Disclosure represents a commitment to transparency and does not necessarily indicate a bias. If you are in doubt about whether to list a relationship/activity/interest, it is preferable that you do so.

The following questions apply to the author's relationships/activities/interests as they relate to the current manuscript only.

The author's relationships/activities/interests should be defined broadly. For example, if your manuscript pertains to the epidemiology of hypertension, you should declare all relationships with manufacturers of antihypertensive medication, even if that medication is not mentioned in the manuscript.

In item #1 below, report all support for the work reported in this manuscript without time limit. For all other items, the time frame for disclosure is the past 36 months.

|                                                           |                                                                                                                                                                                | Name all entities with whom you have this relationship or indicate none (add rows as needed)            | Specifications/Comments (e.g., if payments were made to you or to your institution) |
|-----------------------------------------------------------|--------------------------------------------------------------------------------------------------------------------------------------------------------------------------------|---------------------------------------------------------------------------------------------------------|-------------------------------------------------------------------------------------|
| <b>Time frame: Since the initial planning of the work</b> |                                                                                                                                                                                |                                                                                                         |                                                                                     |
| 1                                                         | All support for the present manuscript (e.g., funding, provision of study materials, medical writing, article processing charges, etc.)<br><b>No time limit for this item.</b> | National Key Technologies R & D Program Precision Medicine Research (2021YFC2500700 and 2016YFC0901101) |                                                                                     |
|                                                           |                                                                                                                                                                                | National Natural Science Foundation of China [81870056]                                                 |                                                                                     |
|                                                           |                                                                                                                                                                                |                                                                                                         |                                                                                     |
|                                                           |                                                                                                                                                                                |                                                                                                         |                                                                                     |
| <b>Time frame: past 36 months</b>                         |                                                                                                                                                                                |                                                                                                         |                                                                                     |
| 2                                                         | Grants or contracts from any entity (if not indicated in item #1 above).                                                                                                       | _____ None                                                                                              |                                                                                     |
|                                                           |                                                                                                                                                                                |                                                                                                         |                                                                                     |
|                                                           |                                                                                                                                                                                |                                                                                                         |                                                                                     |
| 3                                                         | Royalties or licenses                                                                                                                                                          | _____ None                                                                                              |                                                                                     |
|                                                           |                                                                                                                                                                                |                                                                                                         |                                                                                     |
|                                                           |                                                                                                                                                                                |                                                                                                         |                                                                                     |

|    |                                                                                                              |           |  |
|----|--------------------------------------------------------------------------------------------------------------|-----------|--|
| 4  | Consulting fees                                                                                              | ____ None |  |
|    |                                                                                                              |           |  |
|    |                                                                                                              |           |  |
| 5  | Payment or honoraria for lectures, presentations, speakers bureaus, manuscript writing or educational events | ____ None |  |
|    |                                                                                                              |           |  |
|    |                                                                                                              |           |  |
| 6  | Payment for expert testimony                                                                                 | ____ None |  |
|    |                                                                                                              |           |  |
|    |                                                                                                              |           |  |
| 7  | Support for attending meetings and/or travel                                                                 | ____ None |  |
|    |                                                                                                              |           |  |
|    |                                                                                                              |           |  |
| 8  | Patents planned, issued or pending                                                                           | ____ None |  |
|    |                                                                                                              |           |  |
|    |                                                                                                              |           |  |
| 9  | Participation on a Data Safety Monitoring Board or Advisory Board                                            | ____ None |  |
|    |                                                                                                              |           |  |
|    |                                                                                                              |           |  |
| 10 | Leadership or fiduciary role in other board, society, committee or advocacy group, paid or unpaid            | ____ None |  |
|    |                                                                                                              |           |  |
|    |                                                                                                              |           |  |
| 11 | Stock or stock options                                                                                       | ____ None |  |
|    |                                                                                                              |           |  |
|    |                                                                                                              |           |  |
| 12 | Receipt of equipment, materials, drugs, medical writing, gifts or other services                             | ____ None |  |
|    |                                                                                                              |           |  |
|    |                                                                                                              |           |  |
| 13 | Other financial or non-financial interests                                                                   | ____ None |  |
|    |                                                                                                              |           |  |
|    |                                                                                                              |           |  |

**Please summarize the above conflict of interest in the following box:**

This study was supported by National Key Technologies R & D Program Precision Medicine Research (2021YFC2500700 and 2016YFC0901101) and National Natural Science Foundation of China [81870056].

**Please place an “X” next to the following statement to indicate your agreement:**

**X   I certify that I have answered every question and have not altered the wording of any of the questions on this form.**



## ICMJE DISCLOSURE FORM

Date: 2024.3.24

Your Name: Huaping Dai

Manuscript Title: Development of machine learning model in prediction of the rapid progression of interstitial lung disease in patients with idiopathic inflammatory myopathy

Manuscript number (if known): \_\_\_\_\_

In the interest of transparency, we ask you to disclose all relationships/activities/interests listed below that are related to the content of your manuscript. "Related" means any relation with for-profit or not-for-profit third parties whose interests may be affected by the content of the manuscript. Disclosure represents a commitment to transparency and does not necessarily indicate a bias. If you are in doubt about whether to list a relationship/activity/interest, it is preferable that you do so.

The following questions apply to the author's relationships/activities/interests as they relate to the current manuscript only.

The author's relationships/activities/interests should be defined broadly. For example, if your manuscript pertains to the epidemiology of hypertension, you should declare all relationships with manufacturers of antihypertensive medication, even if that medication is not mentioned in the manuscript.

In item #1 below, report all support for the work reported in this manuscript without time limit. For all other items, the time frame for disclosure is the past 36 months.

|                                                           |                                                                                                                                                                                | Name all entities with whom you have this relationship or indicate none (add rows as needed)            | Specifications/Comments (e.g., if payments were made to you or to your institution) |
|-----------------------------------------------------------|--------------------------------------------------------------------------------------------------------------------------------------------------------------------------------|---------------------------------------------------------------------------------------------------------|-------------------------------------------------------------------------------------|
| <b>Time frame: Since the initial planning of the work</b> |                                                                                                                                                                                |                                                                                                         |                                                                                     |
| 1                                                         | All support for the present manuscript (e.g., funding, provision of study materials, medical writing, article processing charges, etc.)<br><b>No time limit for this item.</b> | National Key Technologies R & D Program Precision Medicine Research (2021YFC2500700 and 2016YFC0901101) |                                                                                     |
|                                                           |                                                                                                                                                                                | National Natural Science Foundation of China [81870056]                                                 |                                                                                     |
|                                                           |                                                                                                                                                                                |                                                                                                         |                                                                                     |
|                                                           |                                                                                                                                                                                |                                                                                                         |                                                                                     |
| <b>Time frame: past 36 months</b>                         |                                                                                                                                                                                |                                                                                                         |                                                                                     |
| 2                                                         | Grants or contracts from any entity (if not indicated in item #1 above).                                                                                                       | _____ None                                                                                              |                                                                                     |
|                                                           |                                                                                                                                                                                |                                                                                                         |                                                                                     |
|                                                           |                                                                                                                                                                                |                                                                                                         |                                                                                     |
| 3                                                         | Royalties or licenses                                                                                                                                                          | _____ None                                                                                              |                                                                                     |
|                                                           |                                                                                                                                                                                |                                                                                                         |                                                                                     |
|                                                           |                                                                                                                                                                                |                                                                                                         |                                                                                     |

|    |                                                                                                              |                    |  |
|----|--------------------------------------------------------------------------------------------------------------|--------------------|--|
| 4  | Consulting fees                                                                                              | <u>      </u> None |  |
|    |                                                                                                              |                    |  |
|    |                                                                                                              |                    |  |
| 5  | Payment or honoraria for lectures, presentations, speakers bureaus, manuscript writing or educational events | <u>      </u> None |  |
|    |                                                                                                              |                    |  |
|    |                                                                                                              |                    |  |
| 6  | Payment for expert testimony                                                                                 | <u>      </u> None |  |
|    |                                                                                                              |                    |  |
|    |                                                                                                              |                    |  |
| 7  | Support for attending meetings and/or travel                                                                 | <u>      </u> None |  |
|    |                                                                                                              |                    |  |
|    |                                                                                                              |                    |  |
| 8  | Patents planned, issued or pending                                                                           | <u>      </u> None |  |
|    |                                                                                                              |                    |  |
|    |                                                                                                              |                    |  |
| 9  | Participation on a Data Safety Monitoring Board or Advisory Board                                            | <u>      </u> None |  |
|    |                                                                                                              |                    |  |
|    |                                                                                                              |                    |  |
| 10 | Leadership or fiduciary role in other board, society, committee or advocacy group, paid or unpaid            | <u>      </u> None |  |
|    |                                                                                                              |                    |  |
|    |                                                                                                              |                    |  |
| 11 | Stock or stock options                                                                                       | <u>      </u> None |  |
|    |                                                                                                              |                    |  |
|    |                                                                                                              |                    |  |
| 12 | Receipt of equipment, materials, drugs, medical writing, gifts or other services                             | <u>      </u> None |  |
|    |                                                                                                              |                    |  |
|    |                                                                                                              |                    |  |
| 13 | Other financial or non-financial interests                                                                   | <u>      </u> None |  |
|    |                                                                                                              |                    |  |
|    |                                                                                                              |                    |  |

**Please summarize the above conflict of interest in the following box:**

This study was supported by National Key Technologies R & D Program Precision Medicine Research (2021YFC2500700 and 2016YFC0901101) and National Natural Science Foundation of China [81870056].

**Please place an “X” next to the following statement to indicate your agreement:**

**X   I certify that I have answered every question and have not altered the wording of any of the questions on this form.**
