# Supplementary material for: Development of a machine learning model in prediction of the rapid progression of interstitial lung disease in patients with idiopathic inflammatory myopathy
Source: PubMed Central journal article supplement — Quant Imaging Med Surg. 2024 Nov 8;14(12):9258–75. doi: 10.21037/qims-24-595 (PMC11652001; doi:10.21037/qims-24-595), 2024-11-08
Supplement: qims-14-12-9258-supplementary.pdf [file qims-14-12-9258-supplementary.pdf]

## Appendix 1 Supplementary Method

### *Establishment and validation of ML models*

In the initial stage of model establishing, the Least Absolute Shrinkage and Selection Operator (Lasso) was used to select variables. Our purpose was to identify the features most closely related to RP-ILD diagnosis in patients with IIM-ILD, for our subsequent ML modeling. We specifically chose the Lasso model for QCT features selection to address collinearity and to remove redundant or unmeaningful information provided by the software.

Firstly, we carefully examined the presence of any missing values in the entire dataset of all QCT attributes (table available at <https://cdn.amegroups.cn/static/public/qims-24-595-1.xlsx>). Features with more than 5% missing value were then eliminated (table available at <https://cdn.amegroups.cn/static/public/qims-24-595-2.xlsx>). To substitute the missed value in the retained QCT features, we applied a mean interpolation process. For ensuring that the data distribution remained consistent before and after interpolation, we compared the QCT feature distribution both before and after the interpolation (table available at <https://cdn.amegroups.cn/static/public/qims-24-595-3.xlsx>). Next, we retained all characteristics with a variance that was greater than zero (table available at <https://cdn.amegroups.cn/static/public/qims-24-595-4.xlsx>). In our opinion, a variance of zero illustrated that the features were entirely consistent across all patients and therefore, have no significant value for classification models. Finally, after normalizing the data, a Lasso regression model was established in random 70% data as a train set, and we calculated the mean squared error in the test set (30%) for optimization. The lambda parameter was also optimized using a 5-fold cross-validation in the train set (Figure S1) and the least mean squared error in the test set. We preserved the features whose Lasso coefficients were not eliminated (Table S1).

In the second phase, we implemented eight widely practiced machine learning approaches including Naive Bayes, Logistic Regression, K-Nearest Neighbors, Random Forests, Decision Trees, Gradient Boosting Trees, Support Vector Machines, and Multilayer Perceptron (specific parameters in the Appendix 1). For each model, the overall dataset was randomly partitioned into train and test sets in a 7:3 ratio. Next, we trained the models on the train set and utilized 5-fold cross-validation with grid search to identify the most favorable parameters. To evaluate the efficiency and performance of the models, we derived confusion metrics to calculate accuracy, sensitivity, specificity, precision, F1 score, positive predictive value, negative predictive value, Jacobian index, net reclassification index (NRI), integrated discrimination improvement (IDI), and the AUC (area under the curve) for the ROC (receiver operating characteristic) curve in the test set. Furthermore, we plotted the ROC for each model. By executing this stage, our primary objective was to identify the most outstanding and explainable ML model that predicts the RP-ILD diagnosis based on QCT features.

With the selected ML approach, we included both clinical data and QCT features to build the final model. Specifically, we only included cases with complete clinical and HRCT information and adopted a 7:3 scheme to randomly divide the train and test sets. As the GGOs and consolidation features in HRCT are often considered to be related to RP-ILD outcomes, we specified that the model must incorporate QCT features related to GGOs and consolidation. Similarly, DL<sub>CO</sub> percentage, FEV<sub>1</sub> percentage, and OI are clinical indicators known to be related to RP-ILD, and we also specified that the model must include these indicators.

For the final model evaluation, we used the accuracy, sensitivity, specificity, precision, F1 score, positive predictive value, negative predictive value, Jacobian index, and the AUC based on the prediction value generated from the logistic regression model. Furthermore, we compared the performance differences between the only clinical model, the only HRCT model, and the final combined model using ROC plot, NRI, and IDI. Additionally, we drew calibration curves, nomograms, and clinical decision-making curves to further evaluate the application potentials of the model.

### *Model parameters*

#### **Naive Bayes**

The algorithm calculates the conditional probabilities of the class outcomes (RP-ILD and non-RP-ILD) given the prior information represented by the priori parameters. The 'naive' element of the algorithm refers to its assumption of independence among predictor variables. Nevertheless, since these parameters tend to be interdependent in actual practice, the estimated conditional probabilities may not always be entirely accurate. We utilized the 'naive\_bayes' function from the

'naivebayes' package to establish the model, selecting the parameters 'laplace' was 0, 'usekernel' was False, and adjust was 0, while leaving other parameters at their default values.

### **Logistic regression**

Since logistic regression is designed for binary-dependent variables, RP-ILD and non-RP-ILD types of patients in the dataset were replaced with 1 and 0, respectively. We employed the 'glm' function from the 'stats' package, in combination with the 'step' function in the same package, to develop a stepwise regression model, which was selected based on the principle of minimal AIC (Akaike information criterion) among 1,000 iterations.

### **K-Nearest neighbors**

The K-Nearest Neighbors algorithm relies on the proximity of the novel data point to the nearest neighbors in the training dataset to make decisions. In particular, for classification tasks, the algorithm identifies the class of a new data point by selecting the K closest neighbors based on distance. Hence, with the help of "knn" package, we utilized 'train.kknn' function to construct the optimal model with a ks value of 15, and the kernel was selected as "rectangular".

### **Random forests**

The random forest classifier is a powerful learning method that comprises multiple decision trees. It possesses several advantages, such as insensitivity towards missing or outlier values and consistent stability. As a result, it has been successfully implemented in image feature classification tasks. In the present study, we optimized the mtry parameter and determined 1 to be the optimal value. For the number of trees, we utilized the default value of 300. The package name is "randomForest".

### **Decision trees**

We implemented the classification and regression tree function in the "rpart" package. This function facilitated the construction of decision trees, and the resulting tree included a root node placed at the top to indicate the most significant variable, along with decision nodes and terminal nodes that displayed classification percentages. We selected a decision tree as one of our algorithms for data evaluation, given its exceptional ability to handle varying types of data. We used 0.01 as the "cp" value with 2 as the "maxdepth" parameter.

### **Gradient boosting trees**

In our study, we utilized "XGBoost" modeling based on the "xgboost" package, which proved to be highly effective due to its advanced capability to handle complex and diverse variables. We converted both the testing and training data into matrices, as "XGBoost" solely supports matrix-based model evaluations. We optimally chose "eta", "nrounds", "max\_depth", "gamma", and "colsample\_bytree" as 0.035, 250, 3, 0, 1, respectively.

### **Support vector machines**

In this dataset, support vector machines were employed to tackle the problem of quadratic optimization, which resulted in the creation of optimal separating boundaries between data points. Support vector machines can accommodate both linear and nonlinear class boundaries, taking into account the support vector coordinates of each observation or variable. It was chosen as one of the algorithms to evaluate model performance due to its superior ability to capture the inherent characteristics of the data. We finally designed a "radial" support vector machine with 100 as the C parameter and 0.001 as the sigma parameter using the package named "e1071".

### **Multilayer perceptron**

In this study, multi-layer perceptron-based artificial neural networks were utilized. This supervised learning technique incorporates a feed-forward structure comprised of input, hidden, and output layers. A neural network was selected for model assessment in this investigation due to its capacity to manage high data volatility. The best model had 13 neurons with 0.06 as the decay.

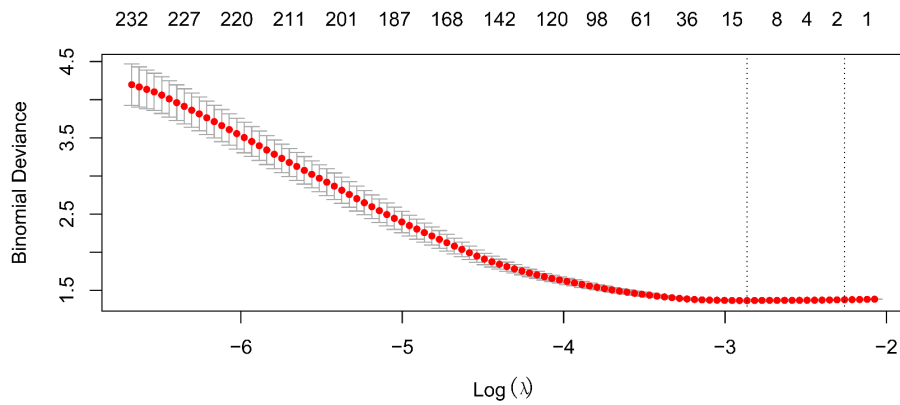

**Figure S1** Searching for the best lambda for Lasso models based on binomial deviance.

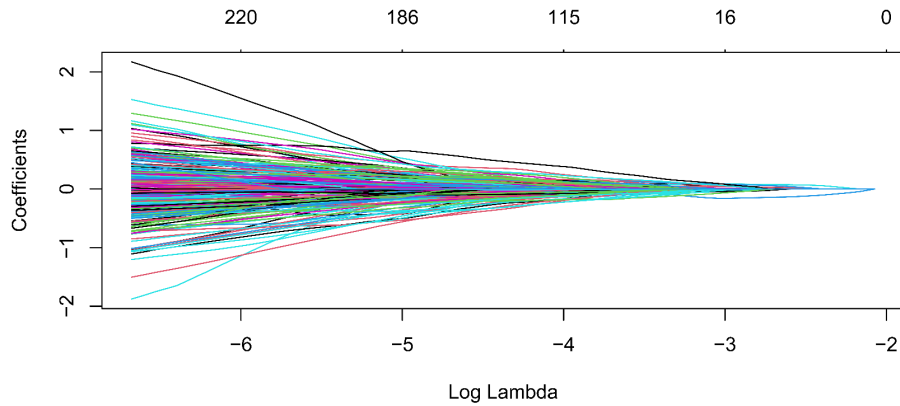

**Figure S2** Coefficients alterations in different Lasso models with different lambda.

| Characteristics                                   | OR (95% CI)          | P value   |
|---------------------------------------------------|----------------------|-----------|
| Subtype                                           |                      |           |
| ASS                                               | reference            | reference |
| MDA5                                              | 4.811 (2.495, 9.277) | <0.001    |
| Gender                                            |                      |           |
| Female                                            | reference            | reference |
| Male                                              | 1.767 (0.931, 3.352) | 0.082     |
| FEV <sub>1</sub> %                                | 0.984 (0.964, 1.004) | 0.117     |
| DLCO%                                             | 0.991 (0.968, 1.014) | 0.444     |
| PulmonaryVascular Lower Left Lobe Maximum Density | 0.613 (0.378, 0.995) | 0.048     |
| Ground Glass Opacity Left Upper Lobe Volume       | 2.244 (1.211, 4.157) | 0.010     |
| Consolidation Right Upper Lobe Mean Density       | 1.176 (0.808, 1.712) | 0.397     |
| Branches Volume                                   | 2.026 (0.994, 4.132) | 0.052     |
| OI                                                | 0.995 (0.991, 1.000) | 0.029     |

**Figure S3** Effects of predicting factors included in the final model. OR, odd ratio; CI, confidence interval; ASS, antisynthetase syndrome; MDA5, melanoma differentiation associated protein 5; FEV<sub>1</sub>%, forced expiratory volume in 1 second as a percentage of the predicted value; DL<sub>CO</sub>%, diffusing capacity of the lung for carbon monoxide as a percentage of the predicted value; OI, oxygenation index.

**Table S1** Quantitative feature with non-zero Lasso coefficients

| Class                     | Name                                              | Coefficient |
|---------------------------|---------------------------------------------------|-------------|
| Pulmonary artery and vein | Vascular curvature                                | 0.043842    |
| Arteries                  | Maximum density (HU)                              | -0.00243    |
| Veins                     | Blood volume at 5% of vascular diameter (mL)      | -0.15156    |
| Lung segment              | Posterior segment R-S6 mean density (HU)          | 0.080865    |
|                           | Supralingual segment L-S4-lung tissue volume (mL) | 0.030311    |
|                           | Supralingual segment L-S4-mass (g)                | 0.000595    |
| Pulmonary fissure         | Left lung oblique fissure-mean density (HU)       | 0.033987    |
|                           | Right lung diastasis-mean curvature               | 0.070957    |
| Lung density              | Left lung-volume (mL)                             | 0.043747    |
| Pulmonary vasculature     | Left lower lobe-maximum density (HU)              | -0.01883    |
| Ground glass              | Upper left lobe-volume (mL)                       | 0.006086    |
| Consolidation             | Right upper lobe-mean density (HU)                | -0.03593    |
| Bronchus                  | 86-volume (mL)                                    | 0.025961    |
|                           | 92-volume (mL)                                    | -0.03694    |

Lasso, least absolute shrinkage and selection operator; HU, Hounsfield unit.

**Table S2** Comparison between train and test datasets using 514 patients

| Class                                   | Features                                          | Overall                    | Train                      | Test                       | P     |
|-----------------------------------------|---------------------------------------------------|----------------------------|----------------------------|----------------------------|-------|
| n                                       |                                                   | 514                        | 359                        | 155                        |       |
| Pulmonary artery and vein: median [IQR] | Vascular curvature                                | 1.09 [1.07, 1.12]          | 1.09 [1.07, 1.12]          | 1.09 [1.08, 1.11]          | 0.816 |
| Arteries: median [IQR]                  | Maximum density (HU)                              | 562.50 [405.25, 768.75]    | 571.00 [405.50, 808.50]    | 542.00 [405.50, 702.50]    | 0.466 |
| Veins: median [IQR]                     | Blood volume at 5% of vascular diameter (mL)      | 14.13 [9.46, 19.89]        | 14.55 [9.86, 20.08]        | 13.14 [8.71, 18.82]        | 0.043 |
| Lung segment: median [IQR]              | Posterior segment R-S6 mean density (HU)          | -709.24 [-770.39, -636.09] | -710.23 [-768.84, -638.55] | -704.61 [-773.77, -631.28] | 0.856 |
|                                         | Supralingual segment L-S4-lung tissue volume (mL) | 29.85 [21.18, 41.14]       | 29.39 [21.00, 39.04]       | 31.54 [22.24, 45.03]       | 0.092 |
|                                         | Supralingual segment L-S4-mass (g)                | 31.05 [22.02, 42.79]       | 30.56 [21.84, 40.60]       | 32.81 [23.12, 46.83]       | 0.092 |
| Pulmonary fissure: median [IQR]         | Left lung oblique fissure-mean density (HU)       | -688.92 [-764.14, -611.26] | -691.17 [-763.74, -614.90] | -687.50 [-767.67, -605.96] | 0.703 |
|                                         | Right lung diastasis-mean curvature               | 0.79 [0.64, 0.98]          | 0.79 [0.65, 0.96]          | 0.81 [0.62, 1.01]          | 0.888 |
| Lung density: median [IQR]              | Left lung-volume (mL)                             | 5.30 [1.40, 14.70]         | 5.65 [1.44, 15.72]         | 4.64 [1.36, 12.59]         | 0.218 |
| Pulmonary vasculature: median [IQR]     | Left lower lobe-maximum density (HU)              | 411.50 [275.25, 528.00]    | 420.00 [275.00, 535.50]    | 391.00 [276.00, 499.00]    | 0.272 |
| Ground glass: median [IQR]              | Upper left lobe-volume (mL)                       | 5.58 [1.27, 18.27]         | 5.44 [1.15, 18.07]         | 6.06 [1.44, 21.76]         | 0.248 |
| Consolidation: median [IQR]             | Right upper lobe-mean density (HU)                | -41.44 [-84.50, -8.61]     | -39.88 [-82.47, -9.62]     | -47.79 [-86.19, -8.32]     | 0.954 |
| Bronchus: median [IQR]                  | 86-volume (mL)                                    | 0.14 [0.07, 0.29]          | 0.14 [0.07, 0.29]          | 0.14 [0.06, 0.30]          | 0.864 |
|                                         | 92-volume (mL)                                    | 0.14 [0.07, 0.27]          | 0.14 [0.07, 0.28]          | 0.14 [0.07, 0.26]          | 0.753 |
| Status, n (%)                           |                                                   |                            |                            |                            | 0.120 |
|                                         | Non-RP-ILD                                        | 265 (51.6%)                | 177 (34.4%)                | 88 (17.1%)                 |       |
|                                         | RP-ILD                                            | 249 (48.4%)                | 182 (35.4%)                | 67 (13.0%)                 |       |
| Subtype, n (%)                          |                                                   |                            |                            |                            | 0.186 |
|                                         | ASS                                               | 357 (69.5%)                | 243 (47.3%)                | 114 (22.2%)                |       |
|                                         | MDA5+ DM                                          | 157 (30.5%)                | 116 (22.6%)                | 41 (8%)                    |       |
| Gender, n (%)                           |                                                   |                            |                            |                            | 0.467 |
|                                         | Female                                            | 367 (71.8%)                | 253 (49.5%)                | 114 (22.3%)                |       |
|                                         | Male                                              | 144 (28.2%)                | 104 (20.4%)                | 40 (7.8%)                  |       |
| Age, median (IQR)                       |                                                   | 54 (46, 61)                | 54 (47, 61)                | 55 (46, 62)                | 0.765 |
| VC, median (IQR)                        |                                                   | 2.21 (1.75, 2.8425)        | 2.19 (1.745, 2.85)         | 2.26 (1.85, 2.75)          | 0.644 |
| VC%, median (IQR)                       |                                                   | 73.20 (61.23, 85.05)       | 73.10 (60.00, 82.15)       | 76.70 (62.40, 90.00)       | 0.120 |
| FVC, median (IQR)                       |                                                   | 2.18 (1.74, 2.82)          | 2.13 (1.72, 2.84)          | 2.26 (1.82, 2.75)          | 0.519 |
| FVC%, median (IQR)                      |                                                   | 74.10 (62.33, 87.18)       | 73.45 (61.45, 84.40)       | 76.90 (64.15, 93.03)       | 0.123 |
| FEV <sub>1</sub> , median (IQR)         |                                                   | 1.79 (1.41, 2.28)          | 1.77 (1.39, 2.28)          | 1.80 (1.47, 2.22)          | 0.763 |
| FEV <sub>1</sub> %, mean ± SD           |                                                   | 72.56±18.11                | 71.70±17.67                | 74.71±19.08                | 0.174 |
| FEV <sub>1</sub> /FVC, median (IQR)     |                                                   | 80.84 (76.48, 85.06)       | 81.35 (76.91, 86.01)       | 80.50 (76.04, 84.34)       | 0.164 |
| TLC, median (IQR)                       |                                                   | 3.54 (2.90, 4.24)          | 3.50 (2.87, 4.25)          | 3.63 (2.97, 4.15)          | 0.742 |
| TLC%, median (IQR)                      |                                                   | 70.40 (59.00, 81.20)       | 69.50 (58.85, 80.80)       | 71.60 (61.33, 82.75)       | 0.265 |
| DL <sub>CO</sub> , median (IQR)         |                                                   | 4.57 (3.66, 5.58)          | 4.49 (3.66, 5.66)          | 4.67 (3.68, 5.46)          | 0.820 |
| DL <sub>CO</sub> %, median (IQR)        |                                                   | 57.20 (45.90, 69.60)       | 56.20 (45.80, 69.25)       | 58.6 (46.15, 69.88)        | 0.761 |
| FiO <sub>2</sub> , median (IQR)         |                                                   | 0.21 (0.21, 0.21)          | 0.21 (0.21, 0.21)          | 0.21 (0.21, 0.21)          | 0.520 |
| PaO <sub>2</sub> , median (IQR)         |                                                   | 84.00 (74.80, 93.00)       | 84.00 (74.85, 92.45)       | 85.00 (74.20, 94.20)       | 0.529 |
| PaCO <sub>2</sub> , median (IQR)        |                                                   | 37.10 (34.35, 40.30)       | 37.25 (34.50, 40.28)       | 37.00 (34.10, 40.90)       | 0.840 |
| OI, median (IQR)                        |                                                   | 390.48 (342.86, 433.57)    | 389.52 (342.86, 429.29)    | 395.24 (342.86, 439.52)    | 0.540 |

For variables that obey normal distribution and have homogeneity of variance, we use a *t*-test. For variables that follow a normal distribution but do not have homogeneity of variance, we use Welch's *t*-test. For variables that do not follow a normal distribution, we use the Wilcoxon rank-sum test. RP-ILD, rapid progressive interstitial lung disease; ASS, anti-synthetase syndrome; MDA5+ DM, anti-melanoma differentiation-associated protein 5 dermatomyositis; VC, vital capacity; VC%, the proportion of actual value to the expected value for vital capacity; FVC, forced vital capacity; FVC%, the proportion of actual value to the expected value for forced vital capacity; FEV<sub>1</sub>, forced expiratory volume in the first second; FEV<sub>1</sub>%, the proportion of actual value to the expected value for forced expiratory volume in the first second; FEV<sub>1</sub>/FVC, the proportion of forced expiratory volume in the first second to the forced vital capacity; TLC, total lung capacity; TLC%, the proportion of actual value to the expected value for total lung capacity; DL<sub>CO</sub>, carbon monoxide diffusing capacity; DL<sub>CO</sub>%, the proportion of actual value to the expected value for carbon monoxide diffusing capacity; FiO<sub>2</sub>, fraction of inhaled oxygen; PaO<sub>2</sub>, arterial oxygen pressure; PaCO<sub>2</sub>, arterial carbon dioxide pressure; IQR, interquartile range; SD, standard deviation; HU, Hounsfield unit.

**Table S3** Comparison between train and test datasets using 270 patients

| Class                                   | Features                                          | Train                      | Test                       | P     |
|-----------------------------------------|---------------------------------------------------|----------------------------|----------------------------|-------|
| n                                       |                                                   | 190                        | 80                         |       |
| Pulmonary artery and vein: median (IQR) | Vascular curvature                                | 1.09 (1.07, 1.12)          | 1.09 (1.07, 1.11)          | 0.626 |
| Arteries: median (IQR)                  | Maximum density (HU)                              | 581.00 (430.50, 934.50)    | 566.50 (412.75, 853.75)    | 0.636 |
| Veins: median (IQR)                     | Blood volume at 5% of vascular diameter (mL)      | 13.74 (10.52, 19.26)       | 15.46 (10.22, 20.49)       | 0.283 |
| Lung segment: median (IQR)              | Posterior segment R-S6 mean density (HU)          | -714.20 (-769.78, -635.54) | -700.01 (-751.39, -640.39) | 0.573 |
|                                         | Supralingual segment L-S4-lung tissue volume (mL) | 29.72 (21.18, 39.22)       | 31.26 (23.11, 42.88)       | 0.326 |
|                                         | Supralingual segment L-S4-mass (g)                | 30.91 (22.03, 40.79)       | 32.52 (24.03, 44.60)       | 0.326 |
| Pulmonary fissure: median (IQR)         | Left lung oblique fissure-mean density (HU)       | -690.28 (-765.80, -621.57) | -698.15 (-763.68, -646.59) | 0.799 |
|                                         | Right lung diastasis-mean curvature               | 0.78 (0.62, 0.96)          | 0.75 (0.59, 0.91)          | 0.718 |
| Lung density: median (IQR)              | Left lung-volume (mL)                             | 5.24 (1.39, 15.62)         | 4.34 (1.10, 14.22)         | 0.691 |
| Pulmonary vasculature: median (IQR)     | Left lower lobe-maximum density (HU)              | 433.50 (279.25, 520.25)    | 403.50 (273.50, 551.00)    | 0.634 |
| Ground glass: median (IQR)              | Upper left lobe-volume (mL)                       | 5.37 (1.39, 18.27)         | 3.83 (1.26, 11.42)         | 0.210 |
| Consolidation: median (IQR)             | Right upper lobe-mean density (HU)                | -40.79 (-78.04, -7.69)     | -34.28 (-68.53, -0.08)     | 0.347 |
| Bronchus: median (IQR)                  | 86-volume (mL)                                    | 0.12 (0.07, 0.29)          | 0.16 (0.08, 0.29)          | 0.367 |
|                                         | 92-volume (mL)                                    | 0.14 (0.07, 0.25)          | 0.16 (0.08, 0.30)          | 0.498 |
| RP, n (%)                               |                                                   |                            |                            | 0.968 |
|                                         | Non-RP-ILD                                        | 105 (38.9%)                | 44 (16.3%)                 |       |
|                                         | RP-ILD                                            | 85 (31.5%)                 | 36 (13.3%)                 |       |
| Subtype, n (%)                          |                                                   |                            |                            | 0.937 |
|                                         | ASS                                               | 141 (52.2%)                | 59 (21.9%)                 |       |
|                                         | MDA5+ DM                                          | 49 (18.1%)                 | 21 (7.8%)                  |       |
| Gender, n (%)                           |                                                   |                            |                            | 0.507 |
|                                         | Female                                            | 145 (53.7%)                | 58 (21.5%)                 |       |
|                                         | Male                                              | 45 (16.7%)                 | 22 (8.1%)                  |       |
| Age, median (IQR)                       |                                                   | 54.00 (47.00, 60.00)       | 57.00 (51.00, 62.00)       | 0.044 |
| VC, median (IQR)                        |                                                   | 2.18 (1.75, 2.80)          | 2.23 (1.75, 2.84)          | 0.814 |
| VC%, median (IQR)                       |                                                   | 73.25 (61.50, 82.40)       | 68.65 (62.00, 85.20)       | 0.771 |
| FVC, median (IQR)                       |                                                   | 2.14 (1.74, 2.82)          | 2.20 (1.70, 2.77)          | 0.895 |
| FVC%, median (IQR)                      |                                                   | 74.50 (62.78, 85.45)       | 70.25 (62.53, 88.03)       | 0.836 |
| FEV <sub>1</sub> , median (IQR)         |                                                   | 1.75 (1.41, 2.28)          | 1.86 (1.41, 2.25)          | 0.856 |
| FEV <sub>1</sub> %, median (IQR)        |                                                   | 73.90 (60.48, 81.80)       | 70.35 (62.00, 84.50)       | 0.971 |
| FEV <sub>1</sub> /FVC, median (IQR)     |                                                   | 81.48 (76.72, 85.96)       | 80.76 (77.35, 84.98)       | 0.838 |
| TLC, median (IQR)                       |                                                   | 3.48 (2.92, 4.15)          | 3.63 (2.86, 4.22)          | 0.782 |
| TLC%, median (IQR)                      |                                                   | 71.15 (60.20, 80.53)       | 68.75 (57.75, 81.23)       | 0.573 |
| DL <sub>CO</sub> , median (IQR)         |                                                   | 4.40 (3.55, 5.35)          | 4.64 (3.56, 5.57)          | 0.530 |
| DL <sub>CO</sub> %, mean ± SD           |                                                   | 56.14±15.98                | 57.29±15.74                | 0.588 |
| FiO <sub>2</sub> , median (IQR)         |                                                   | 0.21 (0.21, 0.21)          | 0.21 (0.21, 0.21)          | 0.058 |
| PaO <sub>2</sub> , median (IQR)         |                                                   | 84.75 (77.00, 92.00)       | 84.50 (78.75, 92.13)       | 0.708 |
| PaCO <sub>2</sub> , median (IQR)        |                                                   | 38.20 (35.53, 41.10)       | 37.15 (34.50, 40.65)       | 0.126 |
| OI, median (IQR)                        |                                                   | 396.43 (359.76, 433.33)    | 400.24 (371.43, 438.10)    | 0.365 |

For variables that obey normal distribution and have homogeneity of variance, we use a *t*-test. For variables that follow a normal distribution but do not have homogeneity of variance, we use Welch's *t*-test. For variables that do not follow a normal distribution, we use the Wilcoxon rank-sum test. RP-ILD, rapid progressive interstitial lung disease; ASS, anti-synthetase syndrome; MDA5+ DM, anti-melanoma differentiation-associated protein 5 dermatomyositis; VC, vital capacity; VC%, the proportion of actual value to the expected value for vital capacity; FVC, forced vital capacity; FVC%, the proportion of actual value to the expected value for forced vital capacity; FEV<sub>1</sub>, forced expiratory volume in the first second; FEV<sub>1</sub>%, the proportion of actual value to the expected value for forced expiratory volume in the first second; FEV<sub>1</sub>/FVC, the proportion of forced expiratory volume in the first second to the forced vital capacity; TLC, total lung capacity; TLC%, the proportion of actual value to the expected value for total lung capacity; DL<sub>CO</sub>, carbon monoxide diffusing capacity; DL<sub>CO</sub>%, the proportion of actual value to the expected value for carbon monoxide diffusing capacity; FiO<sub>2</sub>, fraction of inhaled oxygen; PaO<sub>2</sub>, arterial oxygen pressure; PaCO<sub>2</sub>, arterial carbon dioxide pressure; IQR, interquartile range; SD, standard deviation; HU, Hounsfield unit.

**Table S4** Description of initial treatment strategies between clinical subgroups

| Characteristics                                                                       | Overall           | ASS               | MDA5+ DM          | P      |
|---------------------------------------------------------------------------------------|-------------------|-------------------|-------------------|--------|
| n                                                                                     | 514               | 357               | 157               |        |
| The time from respiratory symptom onset to treatment initiation (month), median (IQR) | 0.83 (0.00, 3.12) | 1.68 (0.00, 5.10) | 0.02 (0.00, 0.98) | <0.001 |
| Initial treatment strategy, n (%)                                                     |                   |                   |                   | <0.001 |
| Glucocorticoid                                                                        | 161 (38.42)       | 122 (45.69)       | 39 (25.66)        |        |
| Glucocorticoid + immunosuppressant (dual)                                             | 174 (41.53)       | 117 (43.82)       | 57 (37.50)        |        |
| Glucocorticoid + immunosuppressants (triple combination)                              | 10 (2.39)         | 1 (0.37)          | 9 (5.92)          |        |
| Glucocorticoid + immunoglobulin                                                       | 17 (4.06)         | 6 (2.25)          | 11 (7.24)         |        |
| Glucocorticoid + immunosuppressant(s) + immunoglobulin                                | 55 (13.13)        | 21 (7.87)         | 34 (22.37)        |        |
| Glucocorticoid + biologics                                                            | 2 (0.48)          | 0 (0.00)          | 2 (1.32)          |        |
| Initial antifibrotic therapy, n (%)                                                   | 26 (6.18)         | 19 (7.06)         | 7 (4.61)          | 0.314  |

ASS, anti-synthetase syndrome; MDA5+ DM, anti-melanoma differentiation-associated protein 5 dermatomyositis; IQR, interquartile range.

**Table S5** Characteristics of included patients with idiopathic inflammation myopathy in the trainset

| Characteristics                     | nonRP-ILD               | RP-ILD                  | P      |
|-------------------------------------|-------------------------|-------------------------|--------|
| n                                   | 177                     | 182                     |        |
| Subtype, n (%)                      |                         |                         | <0.001 |
| ASS                                 | 144 (40.1%)             | 99 (27.6%)              |        |
| MDA5+ DM                            | 33 (9.2%)               | 83 (23.1%)              |        |
| Gender, n (%)                       |                         |                         | 0.046  |
| Female                              | 134 (37.5%)             | 119 (33.3%)             |        |
| Male                                | 43 (12.0%)              | 61 (17.1%)              |        |
| Age, median (IQR)                   | 54.00 (46.00, 59.00)    | 54.00 (47.75, 63.00)    | 0.163  |
| VC, median (IQR)                    | 2.31 (1.83, 3.01)       | 2.00 (1.65, 2.66)       | 0.004  |
| VC%, median (IQR)                   | 75.50 (64.85, 86.75)    | 68.20 (56.75, 78.80)    | <0.001 |
| FVC, median (IQR)                   | 2.28 (1.81, 2.89)       | 1.96 (1.63, 2.61)       | 0.006  |
| FVC%, median (IQR)                  | 76.70 (65.53, 88.73)    | 69.30 (56.98, 81.03)    | 0.001  |
| FEV <sub>1</sub> , median (IQR)     | 1.83 (1.48, 2.40)       | 1.71 (1.34, 2.08)       | 0.010  |
| FEV <sub>1</sub> %, median (IQR)    | 75.65 (62.65, 84.00)    | 67.45 (56.00, 78.18)    | 0.002  |
| FEV <sub>1</sub> /FVC, median (IQR) | 80.90 (76.17, 85.02)    | 81.83 (77.23, 87.40)    | 0.344  |
| TLC, median (IQR)                   | 3.61 (2.98, 4.42)       | 3.36 (2.77, 4.01)       | 0.022  |
| TLC%, median (IQR)                  | 72.45 (62.03, 83.05)    | 64.60 (55.20, 77.50)    | 0.002  |
| DL <sub>CO</sub> , median (IQR)     | 4.86 (3.93, 6.07)       | 4.11 (3.29, 5.07)       | <0.001 |
| DL <sub>CO</sub> %, median (IQR)    | 61.70 (51.43, 71.68)    | 50.20 (42.20, 61.00)    | <0.001 |
| FiO <sub>2</sub> , median (IQR)     | 0.21 (0.21, 0.21)       | 0.21 (0.21, 0.21)       | <0.001 |
| PaO <sub>2</sub> , median (IQR)     | 87.00 (80.00, 93.00)    | 81.00 (72.18, 92.00)    | 0.001  |
| PaCO <sub>2</sub> , mean ± SD       | 38.00±4.11              | 36.93±4.85              | 0.048  |
| OI, median (IQR)                    | 409.52 (376.55, 438.10) | 368.53 (315.17, 422.38) | <0.001 |

For variables that obey normal distribution and have homogeneity of variance, we use a *t*-test. For variables that follow a normal distribution but do not have homogeneity of variance, we use Welch's *t*-test. For variables that do not follow a normal distribution, we use the Wilcoxon rank-sum test. RP-ILD, rapid progressive interstitial lung disease; ASS, anti-synthetase syndrome; MDA5+ DM, anti-melanoma differentiation-associated protein 5 dermatomyositis; VC, vital capacity; VC%, the proportion of actual value to the expected value for vital capacity; FVC, forced vital capacity; FVC%, the proportion of actual value to the expected value for forced vital capacity; FEV<sub>1</sub>, forced expiratory volume in the first second; FEV<sub>1</sub>%, the proportion of actual value to the expected value for forced expiratory volume in the first second; FEV<sub>1</sub>/FVC, the proportion of forced expiratory volume in the first second to the forced vital capacity; TLC, total lung capacity; TLC%, the proportion of actual value to the expected value for total lung capacity; DL<sub>CO</sub>, carbon monoxide diffusing capacity; DL<sub>CO</sub>%, the proportion of actual value to the expected value for carbon monoxide diffusing capacity; FiO<sub>2</sub>, fraction of inhaled oxygen; PaO<sub>2</sub>, arterial oxygen pressure; PaCO<sub>2</sub>, arterial carbon dioxide pressure; IQR, interquartile range; SD, standard deviation.

**Table S6** Characteristics of included patients with idiopathic inflammation myopathy in the test set

| Characteristics                      | RP-ILD                  | Non-RP-ILD              | P      |
|--------------------------------------|-------------------------|-------------------------|--------|
| n                                    | 67                      | 88                      | 0.402  |
| Subtype, n (%)                       |                         |                         |        |
| MDA5+ DM                             | 20 (12.9%)              | 21 (13.5%)              |        |
| ASS                                  | 47 (30.3%)              | 67 (43.2%)              | 0.182  |
| Gender, n (%)                        |                         |                         |        |
| Female                               | 46 (29.9%)              | 68 (44.2%)              |        |
| Male                                 | 21 (13.6%)              | 19 (12.3%)              | 0.123  |
| Age, mean $\pm$ SD                   | 55.58 $\pm$ 12.20       | 52.59 $\pm$ 11.66       | 0.280  |
| VC, median (IQR)                     | 2.26 (1.77, 2.60)       | 2.35 (1.86, 2.92)       | 0.009  |
| VC%, mean $\pm$ SD                   | 69.33 $\pm$ 20.61       | 79.99 $\pm$ 17.21       | 0.155  |
| FVC, median (IQR)                    | 2.20 (1.70, 2.60)       | 2.37 (1.85, 2.94)       | 0.005  |
| FVC%, mean $\pm$ SD                  | 70.30 $\pm$ 21.39       | 82.07 $\pm$ 17.87       | 0.088  |
| FEV <sub>1</sub> , median (IQR)      | 1.75 (1.35, 2.05)       | 1.94 (1.50, 2.38)       | 0.003  |
| FEV <sub>1</sub> %, mean $\pm$ SD    | 67.13 $\pm$ 21.36       | 79.01 $\pm$ 16.34       | 0.314  |
| FEV <sub>1</sub> /FVC, mean $\pm$ SD | 79.64 $\pm$ 6.43        | 80.91 $\pm$ 5.47        | 0.080  |
| TLC, mean $\pm$ SD                   | 3.42 $\pm$ 0.78         | 3.76 $\pm$ 0.95         | 0.009  |
| TLC%, mean $\pm$ SD                  | 66.72 $\pm$ 17.02       | 76.15 $\pm$ 15.49       | 0.055  |
| DL <sub>CO</sub> , mean $\pm$ SD     | 4.23 $\pm$ 1.19         | 4.83 $\pm$ 1.55         | 0.007  |
| DL <sub>CO</sub> %, mean $\pm$ SD    | 51.78 $\pm$ 13.89       | 61.52 $\pm$ 17.11       | 0.009  |
| FiO <sub>2</sub> , median (IQR)      | 0.21 (0.21, 0.21)       | 0.21 (0.21, 0.21)       | <0.001 |
| PaO <sub>2</sub> , median (IQR)      | 78.50 (68.75, 88.33)    | 90.00 (81.20, 98.00)    | 0.032  |
| PaCO <sub>2</sub> , median (IQR)     | 35.25 (33.25, 40.45)    | 38.00 (35.20, 41.10)    | <0.001 |
| OI, median (IQR)                     | 342.86 (301.55, 405.95) | 423.81 (376.19, 461.90) | <0.001 |

For variables that obey normal distribution and have homogeneity of variance, we use a *t*-test. For variables that follow a normal distribution but do not have homogeneity of variance, we use Welch's *t*-test. For variables that do not follow a normal distribution, we use the Wilcoxon rank-sum test. RP-ILD, rapid progressive interstitial lung disease; ASS, anti-synthetase syndrome; MDA5+ DM, anti-melanoma differentiation-associated protein 5 dermatomyositis; VC, vital capacity; VC%, the proportion of actual value to the expected value for vital capacity; FVC, forced vital capacity; FVC%, the proportion of actual value to the expected value for forced vital capacity; FEV<sub>1</sub>, forced expiratory volume in the first second; FEV<sub>1</sub>%, the proportion of actual value to the expected value for forced expiratory volume in the first second; FEV<sub>1</sub>/FVC, the proportion of forced expiratory volume in the first second to the forced vital capacity; TLC, total lung capacity; TLC%, the proportion of actual value to the expected value for total lung capacity; DL<sub>CO</sub>, carbon monoxide diffusing capacity; DL<sub>CO</sub>%, the proportion of actual value to the expected value for carbon monoxide diffusing capacity; FiO<sub>2</sub>, fraction of inhaled oxygen; PaO<sub>2</sub>, arterial oxygen pressure; PaCO<sub>2</sub>, arterial carbon dioxide pressure; SD, standard deviation; IQR, interquartile range.
